# Supplementary material
Source: publisher figshare collection journal article supplement (https://frontiersin.figshare.com/ndownloader/files/33932801)
Supplement: Supplementary file [file 33932801]

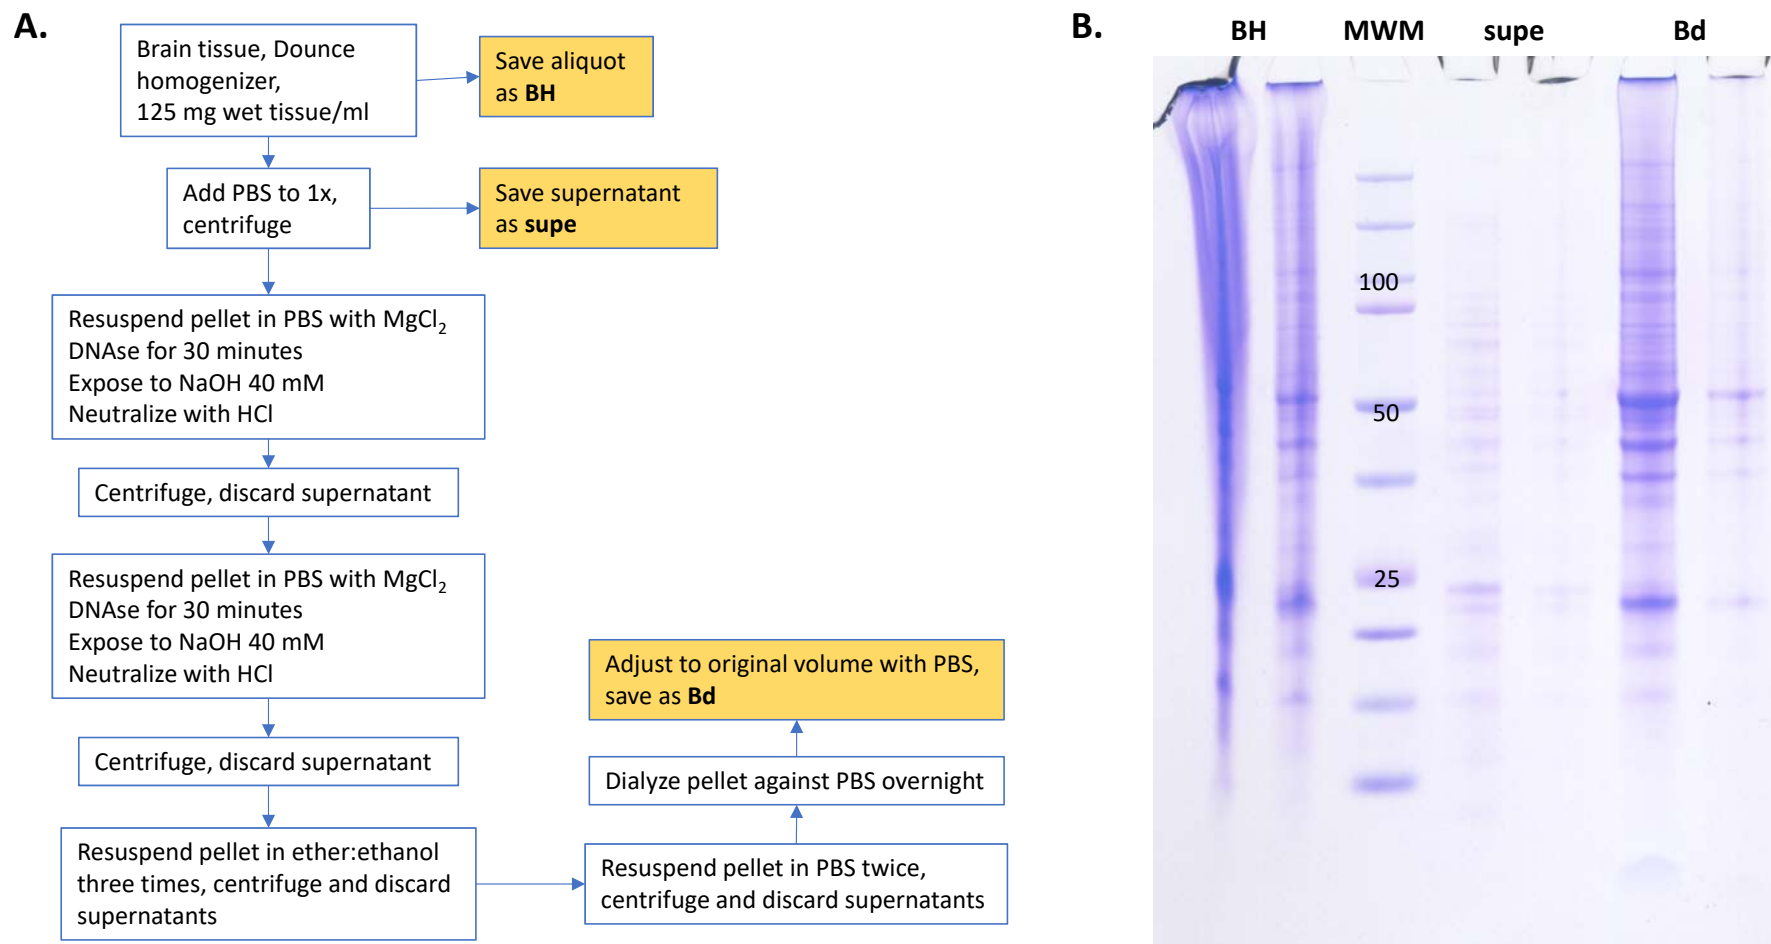

**Supplementary Figure 1:** A. Schematic of procedure. All centrifugations were done at 16,000g for 5 minutes.

B. Coomassie stained gel of fractions BH, supe, and Bd; each fraction is run at two concentrations, 5  $\mu$ l/lane and 1  $\mu$ l/lane. BH does not run well on the gel, but comparison of BH 1  $\mu$ l/lane with Bd demonstrates the presence of similar major protein bands. The lane labeled MWM is molecular weight markers, with selected molecular weights indicated.
